# Supplementary material
Source: PubMed Central journal article supplement (PMC4698221)
Supplement: NIHMS727506-supplement-01.pdf [file NIHMS727506-supplement-01.pdf]

## **TABLES**

See separate files.

## **FIGURE LEGENDS**

Figure. Flow diagram of the process from screening through study completion.

## **DATA SUPPLEMENT**

1. Online Supplemental Figure  
Adobe Acrobat .pdf  
Study schema showing the sequence of events in the study

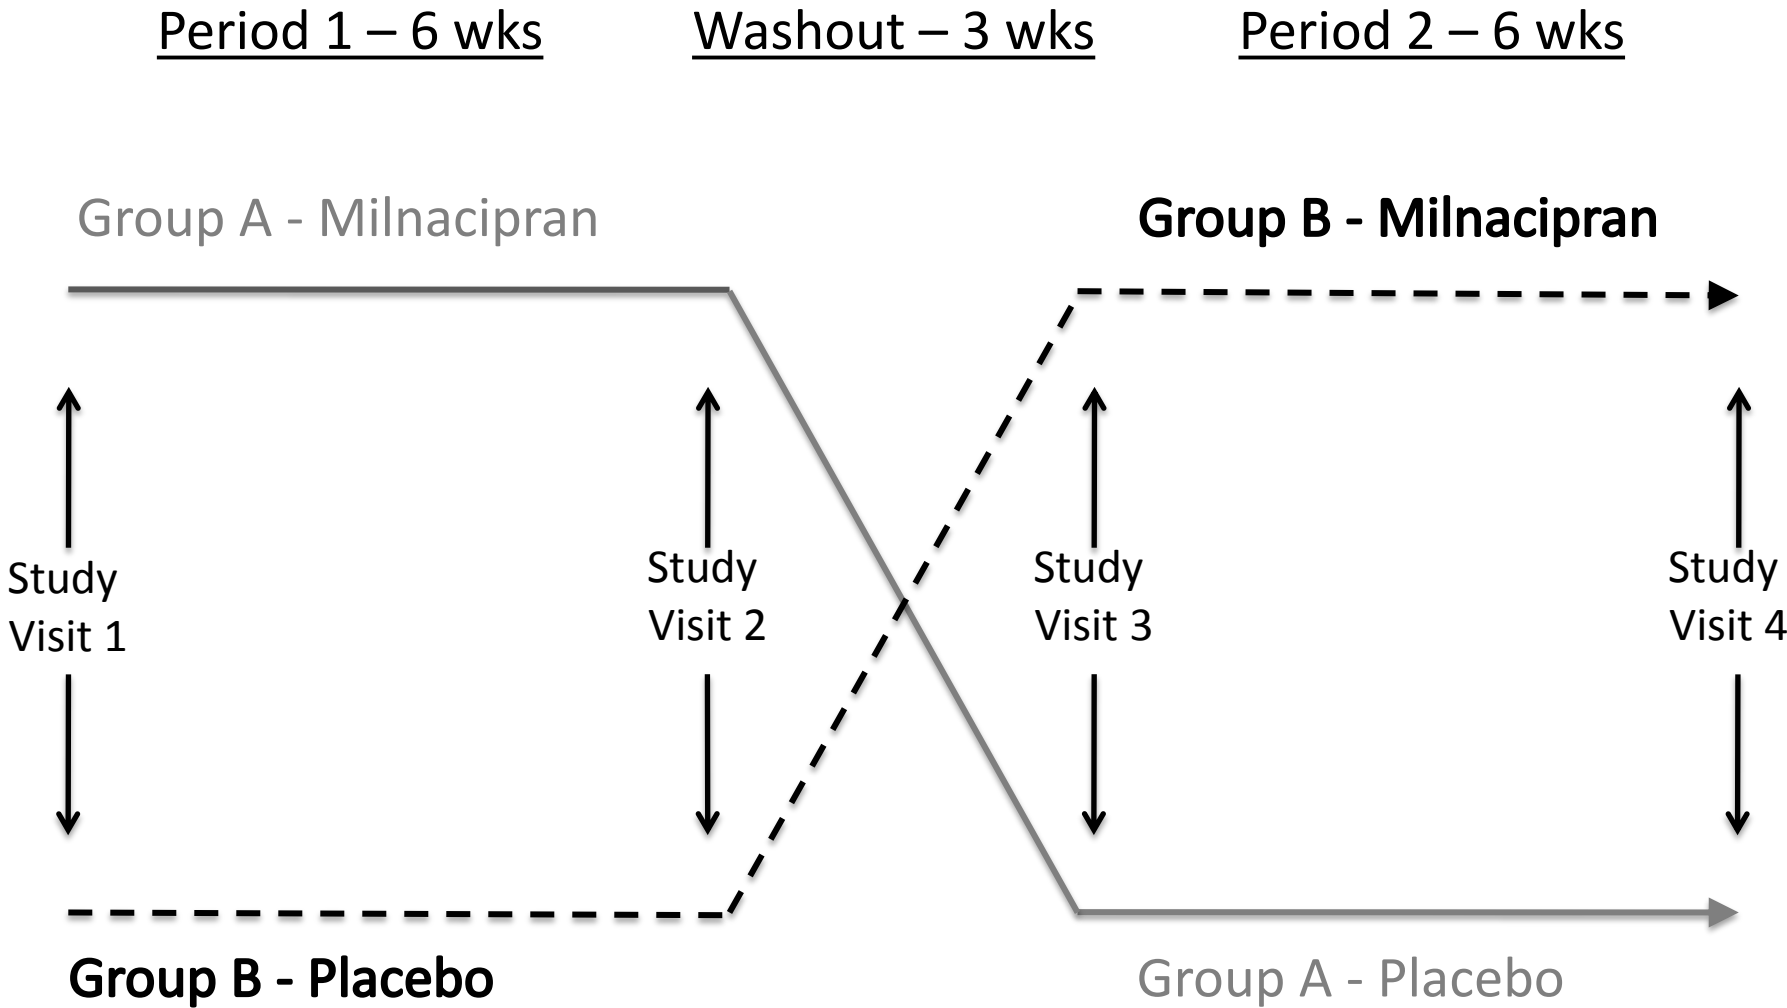

Supplemental Figure. Study schema showing the sequence of events in the study.
